# Supplementary material for: Developing a quantitative estimate of muscle age acceleration by a novel phenotypic clock: cross-sectional study in healthy, middle-aged and older adults
Source: publisher site journal article supplement (doi:10.18632/aging.206269), 2025-06-09
Supplement: Supplementary file [file aging-v17-206269-supplementary-material-SD1.pdf]

## SUPPLEMENTARY MATERIAL 1

Formulae to estimate the individual muscle age\*

### Men

$$\text{MuscleAge} = 65.65 + 2.92 \cdot \text{Scaled\_TUG} - 1.13 \cdot \text{Scaled\_Handgrip} - 2.26 \cdot \text{Scaled\_ASMM}$$

#### *where:*

*Scaled measure = (individual measurement – mean of the study sample)/standard deviation of the study sample*

$$\text{Scaled TUG}^{\#} = (\text{TUG time (s)} - 6.04)/1.08$$

$$\text{Scaled Handgrip} = (\text{Handgrip (kg)} - 36.45)/7.15$$

$$\text{Scaled ASMM} = (\text{ASMM (kg)} - 22.6)/2.76$$

### Women

$$\text{MuscleAge} = 65.72 - 2.54 \cdot \text{Scaled\_TUG} - 1.25 \cdot \text{Scaled\_Handgrip} - 1.21 \cdot \text{Scaled\_6MWT}$$

#### *where:*

$$\text{Scaled TUG} = (\text{TUG time (s)} - 6.69)/1.00$$

$$\text{Scaled Handgrip} = (\text{Handgrip (kg)} - 20.69)/4.17$$

$$\text{Scaled 6MWT} = (\text{6MWT (m)} - 508.18)/74.00$$

*\*based on data from 215 moderately active healthy participants (118 women, 97 men; mean age; 66.0±7.3 years)*

*<sup>#</sup>for men's TUG, which data were significantly skewed to the left of the distribution curve (skewness = 2.209), median and interquartile range of the study sample by Ventura et al. were used instead of mean and standard deviation.*

### Abbreviations

*TUG: Timed-Up-and-Go test; ASMM: Appendicular Skeletal Muscle Mass; 6MWT: 6-Minute Walking test.*
